# Supplementary material for: Integration of DNA and graphene oxide for the construction of various advanced logic circuits
Source: Royal Society of Chemistry journal article supplement (doi:10.1039/c6nr01213b), 2016-01-01
Supplement: c6nr01213b1.pdf [file c6nr01213b1.pdf]

# **Integration of DNA and Graphene Oxide for the Construction of Various Advanced Logic Circuits**

Chunyang Zhou, Dali Liu, Changtong Wu, Yaqing Liu\* and Erkang Wang\*

State Key Laboratory of Electroanalytical Chemistry, Changchun Institute of Applied Chemistry, Chinese Academy of Sciences, Changchun, Jilin, 130022, P. R. China. [ekwang@ciac.ac.cn](mailto:ekwang@ciac.ac.cn), Tel: +86-431-85262003.

Key Laboratory of Food Nutrition and Safety (Tianjin University of Science and Technology), Ministry of Education, Tianjin, 300457, P. R. China, [yaqingliu@tust.edu.cn](mailto:yaqingliu@tust.edu.cn), Tel: +86-22-60912484.

State Key Laboratory on Integrated Optoelectronics, College of Electronic Science and Engineering, Jilin University, Changchun, China.

**Table S1** Sequences of the oligonucleotides used in this work.

| Name                | DNA Sequence (from 5' terminal to 3' terminal)                                   |
|---------------------|----------------------------------------------------------------------------------|
| F-DNA <sub>FA</sub> | AAACC AACCCAAA                                                                   |
| F-DNA <sub>FS</sub> | ATCTA TATCA ACTTA TG                                                             |
| F-DNA <sub>MG</sub> | TTCTT TTCTATCGTA AGTAACAT                                                        |
| IN1                 | ATACTAACTACATACT GGGTTGGGTAGATAGATATACTACAA                                      |
| IN2                 | TTGTAGTATATGTATATGAGGGTTGGG AGTAT GTAGT TAGAT<br>AGATA                           |
| IN3                 | TATCT ATCTA GGGTTGGG TCATA TACAT GTAGT TAGTAT                                    |
| INA                 | ACCCAAACCCAAACCCAAACCCATAAGTTGATATCAATATAG<br>AT                                 |
| INB                 | ATCTATAACTTGATATAGAT TTTT TTTT TTTT TCAACTAT<br>GGGTTTGGGTTTGGGTTTGGG            |
| INC                 | ATCTATATATAGTTGATATC ATCTCAACTT AAAA AAAAA<br>AAAAAT ATATC GGGTTTGGGTTTGGGTTTGGG |
| INA'                | CTACC TTCTA TACGAT                                                               |
| INB'                | ATCTA TACTT AGAA                                                                 |
| INC'                | ATGTTAGATGGTAG                                                                   |

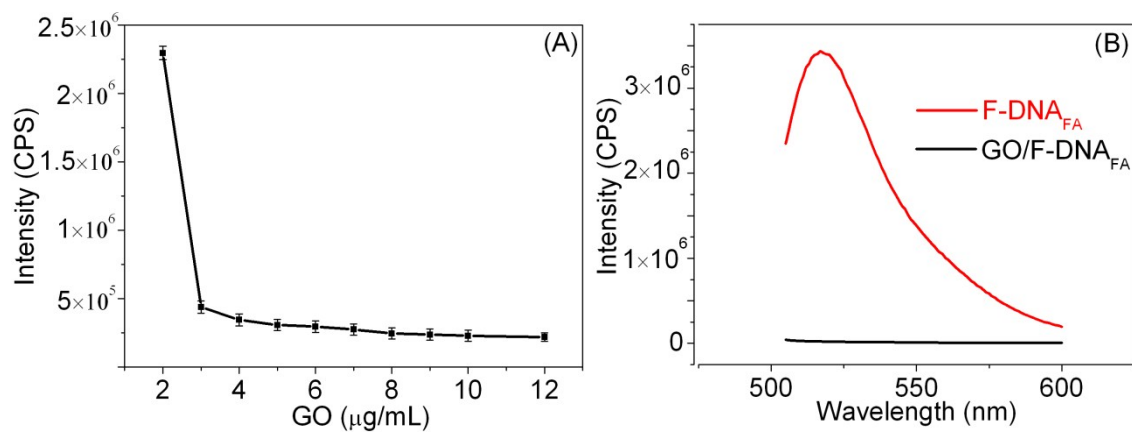

**Fig. S1.** (A) The FAM fluorescence response of F-DNA<sub>FA</sub> in the presence of different concentration of GO. (B) Comparison of FAM fluorescence signal of F1-DNA (100 nM) before and after addition of GO (6  $\mu\text{g/mL}$ ).

When F-DNA<sub>FA</sub> binding on the GO, the fluorescence intensity of FAM is significantly quenched via noncovalent  $\pi$ - $\pi$  stacking interaction.

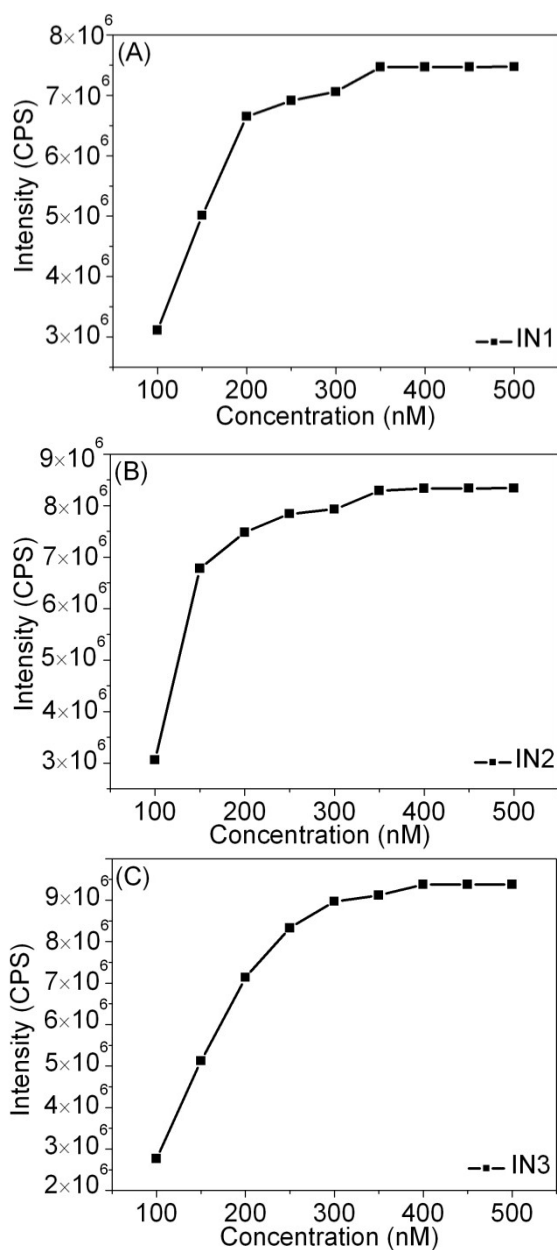

**Fig. S2.** The FAM fluorescence response of GO/F-DNA<sub>FA</sub> at 519 nm with increasing the concentration of IN1 (A), IN2 (B) and IN3 (C).

The fluorescence of FAM is generally recovered and reaches a plateau with increasing the concentration of IN1 (A), IN2 (B) and IN3 (C). Here, 350 nM was used for each input.

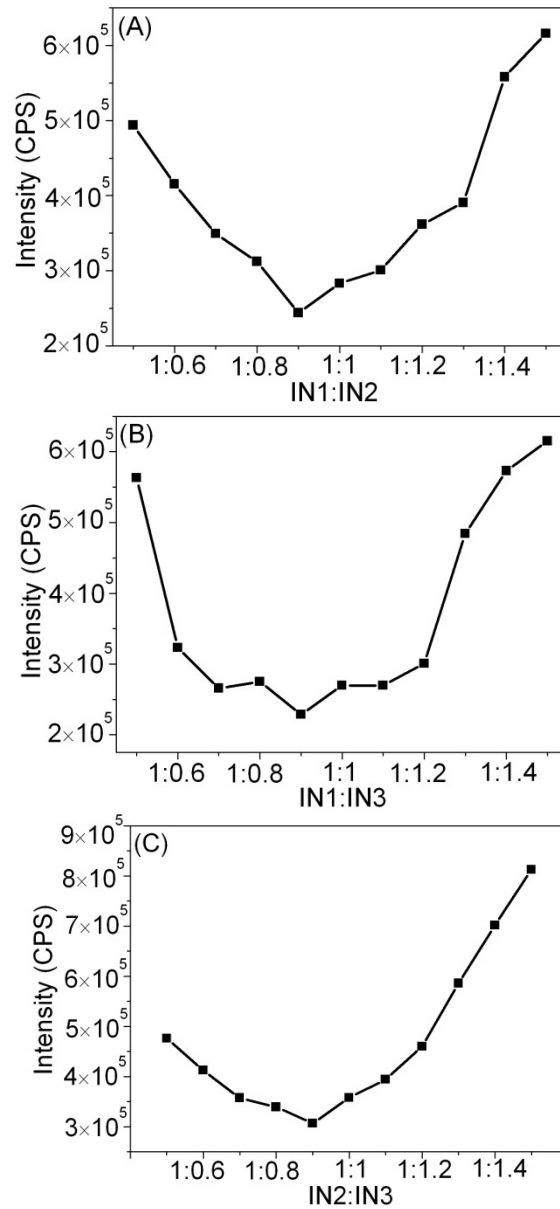

**Fig. S3.** The FAM fluorescence response of F-DNA<sub>FA</sub> with different concentration ratios of IN1:IN2 (A), IN1:IN3 (B) and IN2:IN3 (C).

The fluorescence of FAM is generally decreased when the concentration ratio is close to a proper value. That is because each of the two inputs can hybridize and leave the F-DNA<sub>FA</sub> on the GO with the state of quenched.

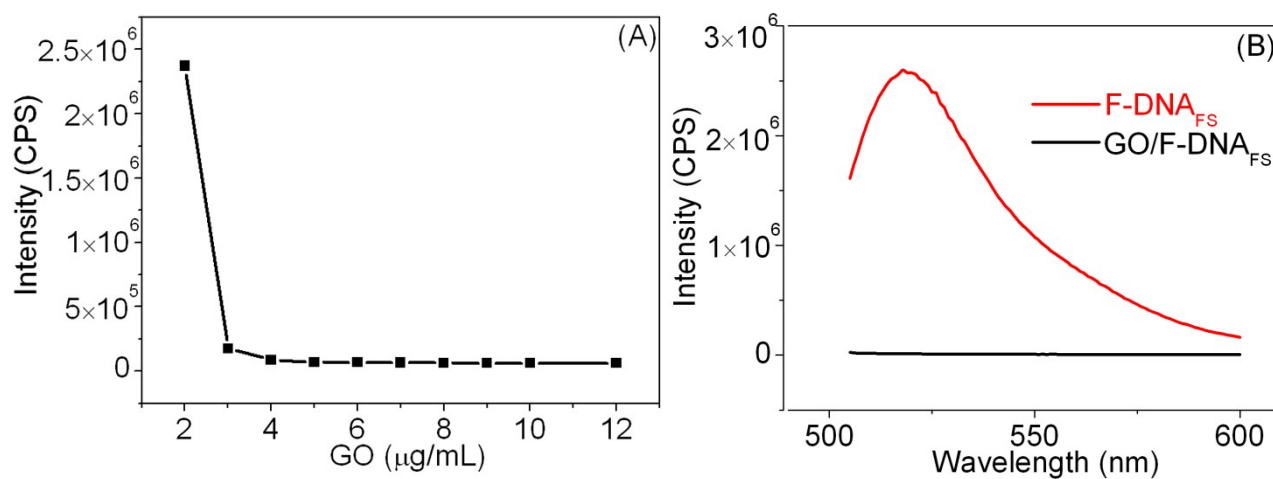

**Fig. S4.** (A) The FAM fluorescence response of F-DNA<sub>FS</sub> in the presence of different concentrations of GO. (B) Comparison of FAM fluorescence signal of F-DNA<sub>FS</sub> (100 nM) before and after the addition of GO (6  $\mu\text{g/mL}$ ).

When F-DNA<sub>FS</sub> binding on the GO, the fluorescence intensity of FAM is significantly quenched via noncovalent  $\pi$ - $\pi$  stacking interaction.

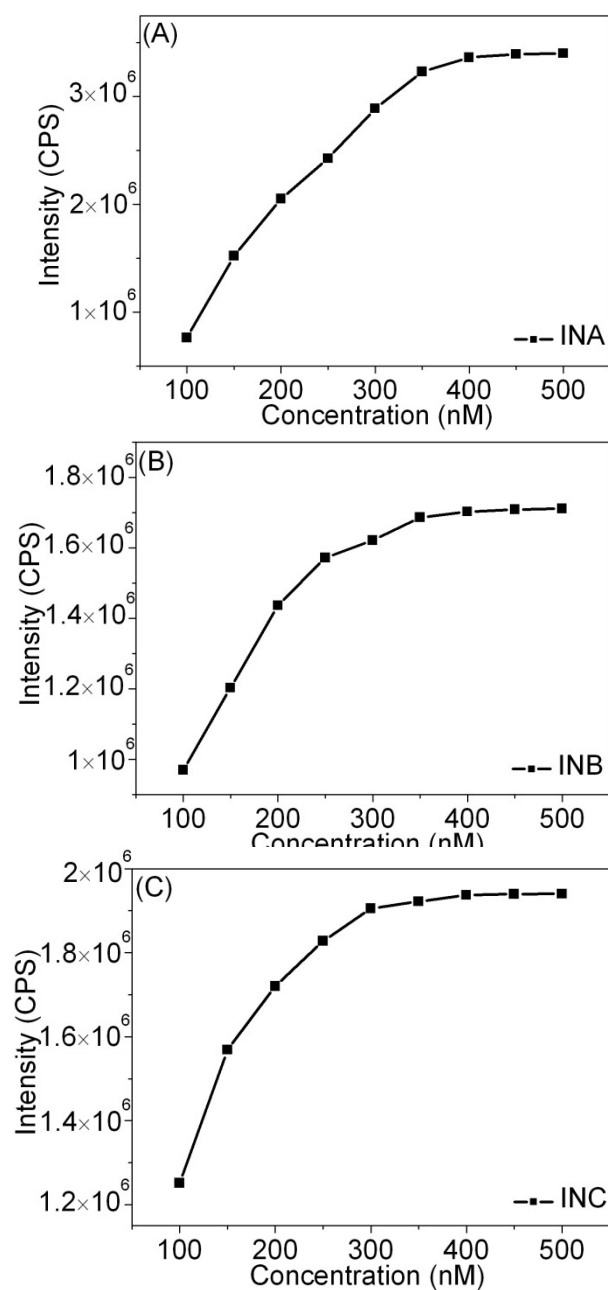

**Fig. S5.** The FAM fluorescence response of GO/ F-DNA<sub>FS</sub> at 519 nm with increasing the concentration of INA (A), INB (B) and INC (C).

The fluorescence of FAM is generally recovered and reaches a plateau with increasing the concentration of INA (A), INB (B) and INC (C). Here, 350 nM was used for each input.

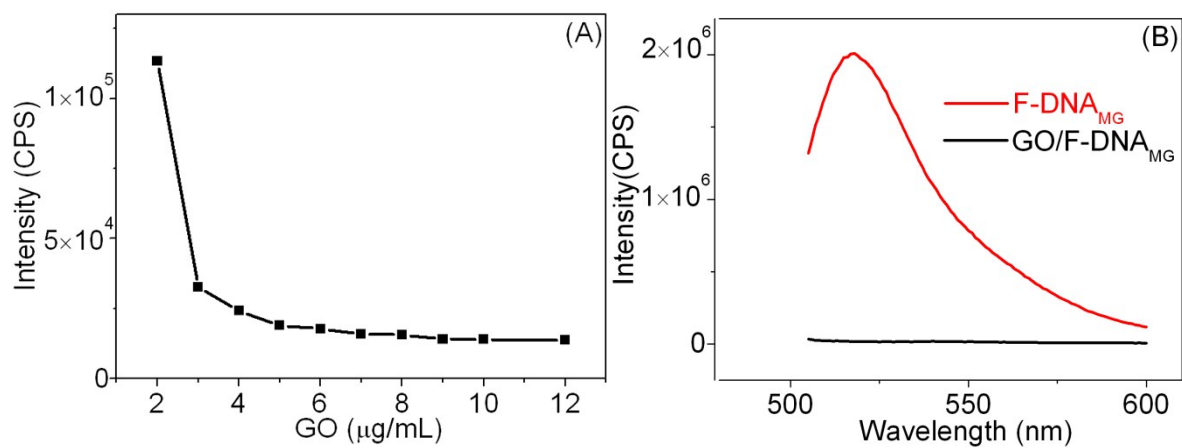

**Fig. S6.** (A) The FAM fluorescence response of F-DNA<sub>MG</sub> in the presence of different concentrations of GO. (B) Comparison of FAM fluorescence signal of F-DNA<sub>MG</sub> (100 nM) before and after the addition of GO (6  $\mu\text{g/mL}$ ).

When F-DNA<sub>MG</sub> binding on the GO, the fluorescence intensity of FAM is significantly quenched via noncovalent  $\pi$ - $\pi$  stacking interaction.



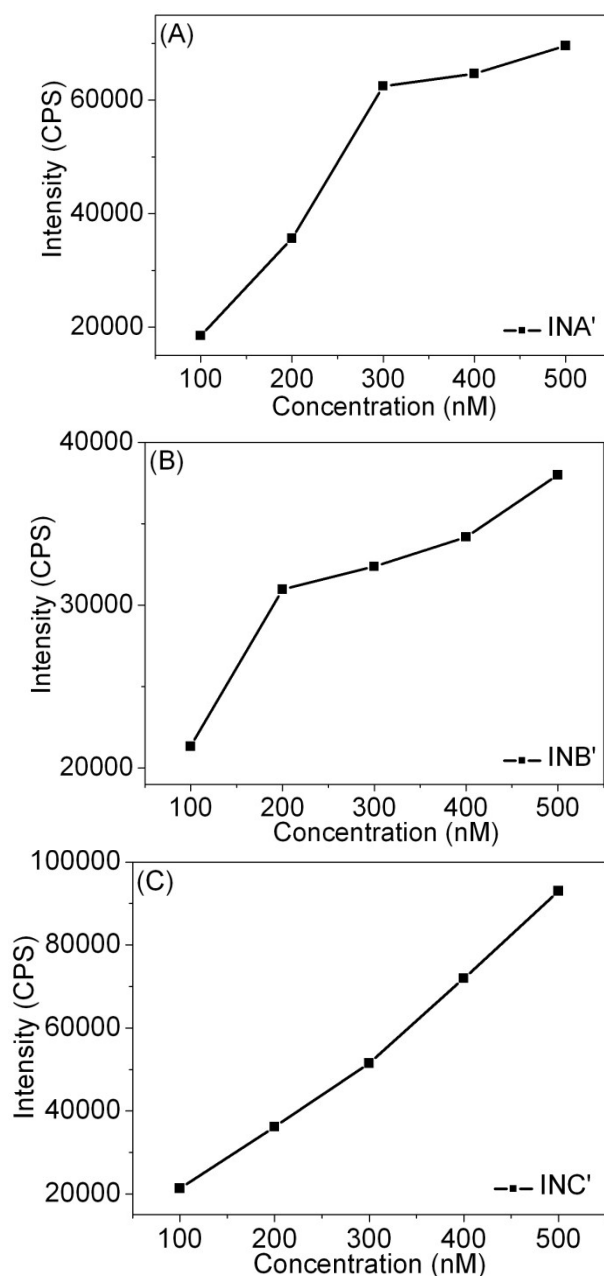

**Fig. S7.** The FAM fluorescence response of GO/F-DNA<sub>MG</sub> at 519 nm with increasing the concentration of INA' (A), INB' (B) and INC' (C).

The fluorescence of FAM is generally recovered and reaches a plateau with increasing the concentration of INA' (A), INB' (B) and INC' (C). Here, 350 nM was used for each input.
